# Supplementary material
Source: PubMed Central journal article supplement (PMC3568551)
Supplement: AEM.02954-12_zam999104062so1.pdf [file AEM.02954-12_zam999104062so1.pdf]

## Supplementary tables

Table S1. Genes that were up-regulated at least two-fold with growth on Fe(III) oxide compared with Fe(III) citrate as the electron acceptor (P-value cutoff  $\leq 0.05$ )

| Gene      | Annotation                                                          | Fold change | P value               | T value |
|-----------|---------------------------------------------------------------------|-------------|-----------------------|---------|
| Gmet_0442 | flagellin fliC                                                      | 94.509 up   | 0.000527              | -11.408 |
| Gmet_1044 | molybdopterin biosynthesis sulfur carrier protein moaD              | 90.156 up   | 0.0473                | -3.442  |
| Gmet_0719 | conserved hypothetical protein                                      | 77.044 up   | 0.0000544             | -21.877 |
| Gmet_1045 | aldehyde ferredoxin oxidoreductase tungsten containing              | 76.354 up   | 0.024                 | -4.247  |
| Gmet_1043 | molybdopterin biosynthesis sulfur carrier protein sulfurylase; moeB | 76.339 up   | 0.0328                | -3.858  |
| Gmet_1046 | ethanol dehydrogenase, putative                                     | 75.546 up   | 0.0334                | -3.841  |
| Gmet_0438 | flagellar hook-associated protein FlgK                              | 56.927 up   | 4.68x10 <sup>-7</sup> | -89.469 |
| Gmet_0430 | flagellar basal body rod protein FlgF                               | 55.842 up   | 0.0000413             | -25.231 |
| Gmet_0439 | flagellar hook-filament junction protein FlgL                       | 52.739 up   | 4.07x10 <sup>-7</sup> | -81.59  |
| Gmet_0432 | flagellar basal body P-ring formation protein FlgA                  | 49.008 up   | 0.0000315             | -32.008 |
| Gmet_0431 | flagellar basal body rod protein FlgG                               | 43.844 up   | 0.000107              | -17.966 |
| Gmet_3115 | flagellar basal-body rod protein FlgB                               | 43.056 up   | 0.000238              | -14.225 |
| Gmet_3112 | flagellar M-ring mounting plate protein FliF                        | 42.517 up   | 0.0000408             | -24.285 |
| Gmet_0908 | hypothetical protein                                                | 42.056 up   | 0.0027                | -7.732  |
| Gmet_3104 | flagellar operon protein of unknown function DUF3766                | 39.524 up   | 0.0104                | -5.415  |
| Gmet_3098 | flagellar biogenesis protein FliO                                   | 39.065 up   | 0.000232              | -14.31  |
| Gmet_0440 | carbon storage regulator, CsrA/carbon storage regulator, CsrA       | 38.440 up   | 0.000198              | -15.016 |
| Gmet_0909 | cytochrome c, 9 heme-binding sites                                  | 37.794 up   | 0.00226               | -8.078  |
| Gmet_0427 | flagellar biogenesis protein FlhF                                   | 37.620 up   | 0.0000946             | -18.375 |
| Gmet_2043 | repeat-containing protein                                           | 37.508 up   | 0.0000161             | -39.331 |
| Gmet_0910 | lipoprotein cytochrome c, 10 heme-binding sites                     | 32.723 up   | 0.00243               | -7.926  |
| Gmet_0444 | flagellar filament cap protein FliD                                 | 32.146 up   | 0.00159               | -8.84   |
| Gmet_3101 | flagellar basal body-associated protein FliL                        | 31.002 up   | 0.000244              | -13.945 |
| Gmet_0433 | flagellar L-ring lipoprotein FlgH                                   | 29.494 up   | 0.0000417             | -23.53  |
| Gmet_3589 | lipoprotein, putative                                               | 29.302 up   | 0.000157              | -15.917 |
| Gmet_0441 | flagellar assembly protein FliW                                     | 29.175 up   | 0.0000958             | -18.385 |
| Gmet_0434 | flagellar P-ring protein FlgI                                       | 29.036 up   | 0.000742              | -10.45  |
| Gmet_0428 | flagellar biogenesis protein FlhG (ATPase)                          | 28.361 up   | 0.0002                | -15.017 |
| Gmet_3105 | flagellar hook capping protein FlgD                                 | 27.424 up   | 0.00868               | -5.662  |
| Gmet_0437 | flagellar biogenesis protein FlgN, putative                         | 27.292 up   | 0.000326              | -12.822 |

|           |                                                                        |           |                       |         |
|-----------|------------------------------------------------------------------------|-----------|-----------------------|---------|
| Gmet_3099 | flagellar motor switch protein FliN                                    | 26.197 up | 0.0000533             | -21.859 |
| Gmet_0429 | RNA polymerase sigma-28 factor for flagellar operon fliA               | 25.445 up | 0.00037               | -12.479 |
| Gmet_3266 | chemotaxis sensor histidine kinase CheA-4                              | 24.699 up | 0.0003                | -13.166 |
| Gmet_3118 | chemotaxis protein phosphatase CheX-1                                  | 23.733 up | 6.77x10 <sup>-7</sup> | -70.028 |
| Gmet_1042 | phosphate-selective porin O and P                                      | 23.706 up | 0.000288              | -13.427 |
| Gmet_3106 | flagellar hook-length control protein FliK                             | 23.315 up | 0.00586               | -6.304  |
| Gmet_3100 | flagellar motor switch protein FliM                                    | 21.723 up | 0.000205              | -14.78  |
| Gmet_2042 | conserved hypothetical protein                                         | 21.680 up | 0.000247              | -14.029 |
| Gmet_2030 | periplasmic polysaccharide biosynthesis/export protein                 | 20.876 up | 0.00014               | -16.389 |
| Gmet_0749 | serine protease, subtilase family                                      | 20.766 up | 0.000631              | -10.841 |
| Gmet_0445 | flagellin export facilitator protein FliS                              | 20.467 up | 0.00253               | -7.859  |
| Gmet_0446 | hypothetical protein                                                   | 19.882 up | 0.00206               | -8.288  |
| Gmet_3103 | flagellar hook protein FlgE                                            | 18.710 up | 0.00663               | -6.099  |
| Gmet_0557 | cytochrome c, 4 heme-binding sites; omcP                               | 18.539 up | 0.00243               | -7.935  |
| Gmet_0531 | rhodanese homology domain pair protein                                 | 18.433 up | 0.000684              | -10.644 |
| Gmet_3113 | flagellar hook-basal body complex protein FliE                         | 18.384 up | 0.0000306             | -29.381 |
| Gmet_2423 | methyl-accepting chemotaxis sensory transducer; mcp018                 | 18.368 up | 0.0000311             | -27.122 |
| Gmet_0679 | cytochrome c, 5 heme-binding sites; omcX                               | 17.969 up | 0.00373               | -7.06   |
| Gmet_0532 | phosphate-selective porin O and P                                      | 17.862 up | 0.000382              | -12.357 |
| Gmet_3092 | hypothetical protein                                                   | 17.526 up | 0.00418               | -6.882  |
| Gmet_1041 | tungstate ABC transporter, periplasmic tungstate-binding protein; tupA | 17.518 up | 0.000213              | -14.541 |
| Gmet_2428 | chemotaxis protein CheY-3                                              | 17.494 up | 0.000179              | -15.475 |
| Gmet_3267 | chemotaxis protein-glutamate methyltransferase CheR-1                  | 17.323 up | 0.000056              | -21.498 |
| Gmet_0426 | flagellar biogenesis protein FlhA                                      | 17.141 up | 0.0000832             | -19.461 |
| Gmet_0558 | cytochrome c, 23-27 heme-binding sites; omcO                           | 17.057 up | 0.00225               | -8.107  |
| Gmet_3586 | conserved hypothetical protein                                         | 16.971 up | 0.000559              | -11.209 |
| Gmet_3096 | flagellar biosynthesis protein FliQ                                    | 16.693 up | 0.000279              | -13.552 |
| Gmet_0571 | cytochrome c, 26 heme-binding sites                                    | 16.506 up | 0.00988               | -5.472  |
| Gmet_3109 | flagellum-specific ATPase FliI                                         | 16.218 up | 0.000473              | -11.736 |
| Gmet_2584 | hypothetical protein                                                   | 15.943 up | 0.0152                | -4.84   |
| Gmet_1606 | BioD and DRTGG domain protein                                          | 15.867 up | 0.00038               | -12.355 |
| Gmet_3476 | response regulator receiver modulated metal dependent phosphohydrolase | 15.725 up | 0.0000904             | -18.62  |
| Gmet_0461 | chemotaxis MotA protein                                                | 15.705 up | 0.000531              | -11.38  |
| Gmet_2424 | methyl-accepting chemotaxis sensory transducer mcp005                  | 15.425 up | 0.0000556             | -21.615 |
| Gmet_2015 | rhodanese homology domain                                              | 15.355 up | 0.000384              | -12.293 |

|           |                                                                                            |           |           |         |
|-----------|--------------------------------------------------------------------------------------------|-----------|-----------|---------|
|           | superfamily selenoprotein, putative                                                        |           |           |         |
| Gmet_0556 | NHL repeat domain protein                                                                  | 15.191 up | 0.00786   | -5.823  |
| Gmet_1039 | tungstate ABC transporter, ATP-binding protein; tupC                                       | 15.109 up | 0.000146  | -16.166 |
| Gmet_3323 | methyl viologen-reducing hydrogenase maturation protease; mvhP                             | 14.574 up | 0.000319  | -12.963 |
| Gmet_0748 | hypothetical protein                                                                       | 14.418 up | 0.000321  | -12.903 |
| Gmet_2029 | polysaccharide chain length determinant protein, putative                                  | 14.281 up | 0.0000316 | -31.271 |
| Gmet_3091 | cytochrome c, 2 heme-binding sites macA                                                    | 13.924 up | 0.0499    | -3.383  |
| Gmet_0435 | flagellar rod-binding protein FlgJ, putative                                               | 13.668 up | 0.00294   | -7.569  |
| Gmet_3111 | flagellar motor switch protein FliG                                                        | 13.537 up | 0.000247  | -13.89  |
| Gmet_3119 | chemotaxis protein CheY-1                                                                  | 13.501 up | 0.0000403 | -24.975 |
| Gmet_0716 | hypothetical protein                                                                       | 12.919 up | 0.000203  | -15.088 |
| Gmet_2825 | methyl-accepting chemotaxis sensory transducer mcp001                                      | 12.457 up | 0.0000387 | -25.922 |
| Gmet_2032 | TPR domain lipoprotein                                                                     | 12.254 up | 0.000112  | -17.584 |
| Gmet_2429 | STAS domain protein                                                                        | 11.949 up | 0.0000846 | -19.538 |
| Gmet_2028 | protein tyrosine kinase, putative                                                          | 11.823 up | 0.0000324 | -27.734 |
| Gmet_3268 | metal dependent phosphohydrolase                                                           | 11.401 up | 0.000245  | -13.949 |
| Gmet_3085 | diguanylate cyclase/phosphodiesterase with PAS/PAC sensor(s)                               | 11.265 up | 0.000513  | -11.539 |
| Gmet_2653 | hypothetical protein                                                                       | 11.224 up | 0.000108  | -17.743 |
| Gmet_3477 | sensor histidine kinase response regulator (HAMP, PAS, PAS, PAS, PAS, HATPase_c, REC, PAS) | 11.213 up | 0.0000423 | -23.6   |
| Gmet_1088 | lipoprotein cytochrome c, 1 heme-binding site                                              | 11.119 up | 0.000541  | -11.322 |
| Gmet_2723 | peroxiredoxin, typical 2-Cys subfamily; prx-1                                              | 11.058 up | 0.00136   | -9.157  |
| Gmet_1090 | trehalose-phosphatase; otsB                                                                | 10.534 up | 0.000571  | -11.135 |
| Gmet_1040 | tungstate ABC transporter, membrane protein; tupB                                          | 10.534 up | 0.00313   | -7.462  |
| Gmet_1707 | sensor histidine kinase response regulator (PAS, PAS, PAC, HisKA, HATPase_c, REC)          | 10.412 up | 0.00047   | -11.762 |
| Gmet_0463 | flagellar protein FlaG protein                                                             | 10.240 up | 0.000041  | -25.074 |
| Gmet_3472 | response regulator receiver domain-containing protein                                      | 10.144 up | 0.0000804 | -19.778 |
| Gmet_3097 | fliP flagellar biosynthesis protein FliP                                                   | 10.037 up | 0.000839  | -10.171 |
| Gmet_3110 | flagellar assembly protein fliH                                                            | 9.854 up  | 0.000515  | -11.518 |
| Gmet_1089 | Na <sup>+</sup> /H <sup>+</sup> antiporter NhaA                                            | 9.843 up  | 0.000247  | -14.055 |
| Gmet_3095 | flagellar biosynthesis protein FliR                                                        | 9.741 up  | 0.0000332 | -27.912 |
| Gmet_3319 | methyl viologen-reducing hydrogenase, small subunit, mvhS                                  | 9.737 up  | 0.00708   | -5.99   |
| Gmet_2655 | hypothetical protein                                                                       | 9.617 up  | 0.0000535 | -22.036 |
| Gmet_2016 | aminotransferase, AHBA_syn family                                                          | 9.415 up  | 0.0000733 | -20.306 |

|           |                                                                           |          |           |         |
|-----------|---------------------------------------------------------------------------|----------|-----------|---------|
| Gmet_3114 | flagellar basal-body rod protein FlgC                                     | 9.232 up | 0.00115   | -9.527  |
| Gmet_0460 | chemotaxis MotB protein                                                   | 9.221 up | 0.0000314 | -27.323 |
| Gmet_2027 | hypothetical protein                                                      | 9.172 up | 0.000247  | -14.114 |
| Gmet_2665 | serine protease inhibitor, Kunitz family                                  | 8.945 up | 0.000378  | -12.352 |
| Gmet_2701 | phosphate ABC transporter, periplasmic phosphate-binding protein; pstS    | 8.796 up | 0.000105  | -17.931 |
| Gmet_0534 | cytochrome c, 5 heme-binding sites                                        | 8.710 up | 0.0013    | -9.268  |
| Gmet_1037 | pyranopterin monophosphate cyclase moaC                                   | 8.591 up | 0.00221   | -8.139  |
| Gmet_2654 | thioredoxin group II protein                                              | 8.558 up | 0.000918  | -9.981  |
| Gmet_2021 | acyl carrier protein; acpP-3                                              | 8.473 up | 0.0000451 | -22.884 |
| Gmet_1095 | conserved hypothetical protein                                            | 8.472 up | 0.0172    | -4.673  |
| Gmet_0155 | cytochrome c, 1 heme-binding site                                         | 8.443 up | 0.0000727 | -20.26  |
| Gmet_2895 | hypothetical protein                                                      | 8.438 up | 0.00128   | -9.307  |
| Gmet_1038 | molybdopterin--molybdenum ligase; moeA-1                                  | 8.265 up | 0.0086    | -5.674  |
| Gmet_0574 | lipoprotein, putative                                                     | 8.162 up | 0.000428  | -12.013 |
| Gmet_3265 | chemotaxis protein CheW-1                                                 | 8.135 up | 0.000378  | -12.391 |
| Gmet_2447 | hypothetical protein                                                      | 7.977 up | 0.000133  | -16.675 |
| Gmet_2734 | radical SAM family protein                                                | 7.930 up | 0.031     | -3.933  |
| Gmet_3473 | response receiver ATPase (REC, PulE)                                      | 7.905 up | 0.0000428 | -23.807 |
| Gmet_2422 | methyl-accepting chemotaxis sensory transducer with Pas/Pac sensor mcp036 | 7.893 up | 0.000207  | -14.725 |
| Gmet_2031 | glycosyltransferase domain protein                                        | 7.893 up | 0.0000826 | -19.239 |
| Gmet_2425 | diguanilate cyclase                                                       | 7.849 up | 0.000615  | -10.909 |
| Gmet_0529 | methyl-accepting chemotaxis sensory transducer mcp032                     | 7.833 up | 0.0000291 | -31.099 |
| Gmet_3116 | lipoprotein, putative                                                     | 7.717 up | 0.000193  | -15.25  |
| Gmet_2985 | conserved hypothetical protein                                            | 7.680 up | 0.00654   | -6.128  |
| Gmet_2512 | hypothetical protein                                                      | 7.661 up | 0.00061   | -10.94  |
| Gmet_1908 | cytochrome b1 (bacterioferritin)                                          | 7.653 up | 0.0106    | -5.374  |
| Gmet_3321 | methyl viologen-reducing hydrogenase-associated ferredoxin mvhF           | 7.645 up | 0.00369   | -7.099  |
| Gmet_2656 | hypothetical protein                                                      | 7.587 up | 0.000301  | -13.127 |
| Gmet_0573 | ResC/HemX-like cytochrome c biogenesis membrane protein                   | 7.578 up | 0.0000915 | -18.739 |
| Gmet_1036 | molybdopterin adenylyltransferase MoaB, putative                          | 7.558 up | 0.000626  | -10.863 |
| Gmet_1607 | chemotaxis protein CheY-4                                                 | 7.552 up | 0.00467   | -6.678  |
| Gmet_2834 | ron-sulfur-oxygen hybrid cluster protein (prismane); hcp                  | 7.513 up | 0.00336   | -7.295  |
| Gmet_2020 | AMP-forming acyl-CoA synthetase                                           | 7.435 up | 0.0000848 | -19.465 |
| Gmet_0169 | nodulin 21-like transmembrane protein                                     | 7.303 up | 0.000642  | -10.79  |
| Gmet_0462 | flagellar protein FlbD                                                    | 7.236 up | 0.00961   | -5.516  |
| Gmet_2420 | chemotaxis protein-glutamate                                              | 7.152 up | 0.0247    | -4.213  |

|           |                                                                                             |          |           |         |
|-----------|---------------------------------------------------------------------------------------------|----------|-----------|---------|
|           | methyltransferase CheR-2                                                                    |          |           |         |
| Gmet_3320 | methyl viologen-reducing hydrogenase, large subunit; mvhL                                   | 7.132 up | 0.00161   | -8.814  |
| Gmet_0775 | OmpA domain porin (beta-barrel, OmpA, OmpA)                                                 | 7.076 up | 0.0193    | -4.531  |
| Gmet_0158 | hypothetical protein                                                                        | 7.052 up | 0.000208  | -14.646 |
| Gmet_0705 | membrane protein, putative                                                                  | 7.021 up | 0.0125    | -5.123  |
| Gmet_0436 | negative regulator of flagellin synthesis FlgM                                              | 6.968 up | 0.0144    | -4.925  |
| Gmet_1618 | protein of unknown function DUF327                                                          | 6.964 up | 0.00326   | -7.364  |
| Gmet_0704 | conserved hypothetical protein                                                              | 6.957 up | 0.0465    | -3.466  |
| Gmet_0572 | ResB-like family cytochrome c biogenesis protein                                            | 6.895 up | 0.000111  | -17.548 |
| Gmet_2658 | PDZ/DHR/GLGF:ankyrin                                                                        | 6.894 up | 0.000298  | -13.208 |
| Gmet_3120 | hypothetical protein                                                                        | 6.885 up | 0.000117  | -17.132 |
| Gmet_2652 | PDZ domain thioredoxin group II protein                                                     | 6.832 up | 0.0000584 | -21.262 |
| Gmet_0156 | protein of unknown function DUF488                                                          | 6.822 up | 0.000199  | -15.08  |
| Gmet_2427 | chemotaxis sensor histidine kinase CheA-1                                                   | 6.790 up | 0.00666   | -6.092  |
| Gmet_2470 | cytochrome c, 27 heme-binding sites                                                         | 6.767 up | 0.000572  | -11.104 |
| Gmet_3646 | conserved hypothetical protein                                                              | 6.720 up | 0.0000315 | -28.844 |
| Gmet_0244 | hypothetical protein                                                                        | 6.660 up | 0.0328    | -3.864  |
| Gmet_2024 | asparagine synthetase;asnB-2                                                                | 6.655 up | 0.000469  | -11.774 |
| Gmet_2017 | FemAB superfamily protein                                                                   | 6.631 up | 0.00103   | -9.745  |
| Gmet_0241 | lipoprotein, putative                                                                       | 6.571 up | 0.0193    | -4.533  |
| Gmet_0168 | NADH dehydrogenase I, L subunit; nuoL-2                                                     | 6.539 up | 0.00176   | -8.61   |
| Gmet_2409 | intracellular protease, PfpI family, putative                                               | 6.449 up | 0.00143   | -9.072  |
| Gmet_2659 | hypothetical protein                                                                        | 6.340 up | 0.0000907 | -18.715 |
| Gmet_3475 | GTPase, putative                                                                            | 6.275 up | 0.000488  | -11.647 |
| Gmet_1092 | polyphosphate-dependent ADP kinase                                                          | 6.271 up | 0.0139    | -4.967  |
| Gmet_2583 | multicopper oxidase, putative                                                               | 6.257 up | 0.000638  | -10.809 |
| Gmet_0849 | sensor cyclic diguanylate phosphodiesterase (HAMP, GAF, HD-GYP), putative heme-binding site | 6.255 up | 0.000316  | -13.002 |
| Gmet_1015 | hypothetical protein                                                                        | 6.215 up | 0.0468    | -3.457  |
| Gmet_2014 | glycosyltransferase, family 2                                                               | 6.127 up | 0.000167  | -15.707 |
| Gmet_0565 | hypothetical protein                                                                        | 6.063 up | 0.000202  | -14.858 |
| Gmet_2025 | Formyl transferase-like                                                                     | 6.029 up | 0.0000415 | -24.678 |
| Gmet_2660 | hypothetical protein                                                                        | 6.018 up | 0.00044   | -11.929 |
| Gmet_1811 | 4Fe-4S ferredoxin, iron-sulfur binding protein                                              | 5.900 up | 0.00369   | -7.101  |
| Gmet_3117 | response regulator receiver domain-containing protein                                       | 5.878 up | 0.00939   | -5.559  |
| Gmet_0153 | NADH dehydrogenase I, B/C/D subunits; nuoBCD                                                | 5.827 up | 0.000115  | -17.222 |
| Gmet_3621 | hypothetical protein                                                                        | 5.789 up | 0.000329  | -12.789 |

|           |                                                               |          |           |         |
|-----------|---------------------------------------------------------------|----------|-----------|---------|
| Gmet_2469 | fibronectin type III-like repeat protein                      | 5.783 up | 0.00313   | -7.458  |
| Gmet_1812 | polysulphide reductase, NrfD                                  | 5.709 up | 0.000572  | -11.122 |
| Gmet_3546 | pentapeptide repeat-containing protein                        | 5.662 up | 0.00106   | -9.673  |
| Gmet_3618 | hypothetical protein                                          | 5.656 up | 0.0036    | -7.147  |
| Gmet_0167 | NADH dehydrogenase I, K subunit lipoprotein; nuok-2           | 5.648 up | 0.00739   | -5.91   |
| Gmet_1833 | integration host factor, beta subunit; ihfB-1                 | 5.609 up | 0.000208  | -14.668 |
| Gmet_1868 | cytochrome c, 4 heme-binding sites                            | 5.566 up | 0.00159   | -8.847  |
| Gmet_2018 | FemAB superfamily protein                                     | 5.556 up | 0.000285  | -13.411 |
| Gmet_1813 | hypothetical protein                                          | 5.529 up | 0.000585  | -11.029 |
| Gmet_2448 | major royal jelly-related protein                             | 5.437 up | 0.0165    | -4.734  |
| Gmet_3318 | hypothetical protein; mvhR                                    | 5.435 up | 0.00219   | -8.162  |
| Gmet_2622 | conserved hypothetical protein                                | 5.427 up | 0.0323    | -3.887  |
| Gmet_0171 | NADH dehydrogenase I, M subunit; nuoM-2                       | 5.392 up | 0.0000337 | -29.812 |
| Gmet_0717 | hypothetical protein                                          | 5.370 up | 0.0123    | -5.155  |
| Gmet_2033 | conserved hypothetical protein                                | 5.297 up | 0.0144    | -4.916  |
| Gmet_3094 | flagellar biogenesis protein FlhB                             | 5.289 up | 0.000825  | -10.217 |
| Gmet_3495 | serine phosphatase, SpoIIE domain-containing                  | 5.182 up | 0.0367    | -3.729  |
| Gmet_1083 | sensor histidine kinase (PAS, PAS, PAC, HisKA, HATPase_c)     | 5.173 up | 0.000945  | -9.908  |
| Gmet_2026 | type II secretion system ATPase ExeA                          | 5.165 up | 0.000289  | -13.348 |
| Gmet_0456 | hypothetical protein                                          | 5.104 up | 0.0242    | -4.236  |
| Gmet_2465 | major facilitator transporter                                 | 5.099 up | 0.000123  | -16.963 |
| Gmet_1706 | response regulator receiver modulated diguanylate cyclase     | 5.096 up | 0.0373    | -3.709  |
| Gmet_1022 | respiratory nitrate reductase, gamma subunit; narI-2          | 5.080 up | 0.00346   | -7.241  |
| Gmet_1851 | pentapeptide repeat-containing protein                        | 5.054 up | 0.0007    | -10.592 |
| Gmet_1866 | cytochrome c, 3-4 heme-binding sites                          | 5.037 up | 0.00795   | -5.801  |
| Gmet_2594 | fatty acyltransferase-like lipase, putative                   | 5.028 up | 0.0115    | -5.247  |
| Gmet_3388 | hypothetical protein                                          | 5.004 up | 0.0000834 | -19.267 |
| Gmet_2498 | heat shock protein Hsp90; htpG                                | 4.994 up | 0.00032   | -12.895 |
| Gmet_2446 | dioxygenase, putative                                         | 4.988 up | 0.00628   | -6.19   |
| Gmet_0170 | cytochrome c, 8 heme-binding sites                            | 4.950 up | 0.0000406 | -24.163 |
| Gmet_3514 | lipoprotein, putative                                         | 4.945 up | 0.00174   | -8.634  |
| Gmet_0455 | sialic acid synthase; neuB                                    | 4.930 up | 0.00601   | -6.264  |
| Gmet_2661 | ankyrin repeat protein                                        | 4.887 up | 0.00128   | -9.304  |
| Gmet_0160 | pyridoxamine 5'-phosphate oxidase-related FMN-binding protein | 4.869 up | 0.000371  | -12.457 |
| Gmet_3322 | conserved hypothetical protein; mvhU                          | 4.848 up | 0.0236    | -4.272  |
| Gmet_3324 | HAMP domain-containing methyl-                                | 4.848 up | 0.0326    | -3.876  |

|           |                                                                             |          |           |         |
|-----------|-----------------------------------------------------------------------------|----------|-----------|---------|
|           | accepting chemotaxis sensory transducer; mvhV                               |          |           |         |
| Gmet_1928 | ferritin-like domain protein                                                | 4.822 up | 0.00367   | -7.114  |
| Gmet_1245 | TonB-dependent receptor, putative                                           | 4.813 up | 0.000031  | -27.659 |
| Gmet_2945 | TPR domain protein                                                          | 4.808 up | 0.0336    | -3.833  |
| Gmet_2003 | exopolysaccharide synthesis multitransmembrane protein H (exosortase), epsH | 4.776 up | 0.00649   | -6.145  |
| Gmet_0566 | radical SAM domain iron-sulfur cluster-binding oxidoreductase               | 4.770 up | 0.000926  | -9.959  |
| Gmet_1967 | membrane protein, putative                                                  | 4.768 up | 0.00833   | -5.721  |
| Gmet_0568 | ABC transporter, periplasmic substrate-binding lipoprotein                  | 4.761 up | 0.0023    | -8.038  |
| Gmet_0154 | NADH dehydrogenase I, E subunit; nuoE-2                                     | 4.743 up | 0.00832   | -5.721  |
| Gmet_2748 | sensor histidine kinase (GAF, HisKA, HATPase_c)                             | 4.738 up | 0.00009   | -18.685 |
| Gmet_1966 | lipoprotein, putative                                                       | 4.719 up | 0.00328   | -7.347  |
| Gmet_2023 | polysaccharide deacetylase domain protein                                   | 4.704 up | 0.000149  | -16.083 |
| Gmet_0907 | conserved hypothetical protein                                              | 4.704 up | 0.0217    | -4.384  |
| Gmet_1680 | conserved hypothetical protein                                              | 4.694 up | 0.00299   | -7.543  |
| Gmet_2666 | hypothetical protein                                                        | 4.681 up | 0.00321   | -7.411  |
| Gmet_0157 | NADH dehydrogenase I, F subunit, nuoF-2                                     | 4.670 up | 0.00895   | -5.625  |
| Gmet_1831 | conserved hypothetical protein                                              | 4.663 up | 0.014     | -4.974  |
| Gmet_0967 | type IV pilus tip-associated adhesin, pilY1-2                               | 4.637 up | 0.0000394 | -25.638 |
| Gmet_3121 | hemerythrin family protein                                                  | 4.607 up | 0.000358  | -12.576 |
| Gmet_3187 | DNA polymerase II, putative                                                 | 4.592 up | 0.00294   | -7.572  |
| Gmet_0789 | aldehyde dehydrogenase family 11 protein                                    | 4.577 up | 0.00797   | -5.792  |
| Gmet_1469 | AMP-forming acyl-CoA synthetase                                             | 4.563 up | 0.00327   | -7.369  |
| Gmet_0564 | conserved hypothetical protein                                              | 4.519 up | 0.00363   | -7.13   |
| Gmet_1702 | deoxyguanosine triphosphate triphosphohydrolase, putative                   | 4.461 up | 0.0228    | -4.313  |
| Gmet_3269 | chemotaxis protein-glutamate methyltransferase CheB                         | 4.439 up | 0.000526  | -11.421 |
| Gmet_0561 | lipoprotein, putative                                                       | 4.425 up | 0.00014   | -16.343 |
| Gmet_0793 | conserved hypothetical protein                                              | 4.397 up | 0.000113  | -17.39  |
| Gmet_3108 | flagellar export protein FliJ                                               | 4.391 up | 0.00485   | -6.612  |
| Gmet_2896 | cytochrome c, 4 heme-binding sites                                          | 4.361 up | 0.00963   | -5.512  |
| Gmet_2664 | radical SAM domain iron-sulfur cluster-binding oxidoreductase, putative     | 4.306 up | 0.00211   | -8.237  |
| Gmet_0152 | NADH dehydrogenase I, A subunit; nuoA-2                                     | 4.254 up | 0.0109    | -5.333  |
| Gmet_2618 | 6-phosphogluconolactonase; pgl                                              | 4.251 up | 0.0225    | -4.333  |
| Gmet_0033 | ATPase, AAA family                                                          | 4.249 up | 0.000245  | -13.876 |
| Gmet_0580 | lipoprotein cytochrome c, 14 heme-binding sites                             | 4.248 up | 0.0071    | -5.985  |
| Gmet_1968 | conserved hypothetical protein                                              | 4.231 up | 0.0449    | -3.503  |

|           |                                                                                                      |          |           |         |
|-----------|------------------------------------------------------------------------------------------------------|----------|-----------|---------|
| Gmet_2703 | phosphate ABC transporter, membrane protein PstA                                                     | 4.213 up | 0.000398  | -12.2   |
| Gmet_1470 | conserved hypothetical protein                                                                       | 4.207 up | 0.0000326 | -29.493 |
| Gmet_0029 | chaperonin GroEL                                                                                     | 4.204 up | 0.00199   | -8.353  |
| Gmet_1082 | sigma-54-dependent transcriptional response regulator (REC, sigma54 interaction, HTH8)               | 4.193 up | 0.0037    | -7.078  |
| Gmet_0030 | serine protein kinase, putative; prkA                                                                | 4.121 up | 0.00564   | -6.359  |
| Gmet_0560 | conserved hypothetical protein                                                                       | 4.110 up | 0.00534   | -6.46   |
| Gmet_1091 | conserved hypothetical protein                                                                       | 4.071 up | 0.036     | -3.754  |
| Gmet_2608 | conserved hypothetical protein                                                                       | 4.062 up | 0.00249   | -7.881  |
| Gmet_1867 | cytochrome c, 7-8 heme-binding sites                                                                 | 4.053 up | 0.0177    | -4.63   |
| Gmet_1468 | alpha/beta hydrolase superfamily protein                                                             | 4.052 up | 0.000746  | -10.432 |
| Gmet_0889 | LysM domain protein                                                                                  | 4.050 up | 0.000321  | -12.915 |
| Gmet_1923 | cytochrome b/b6 complex, cytochrome b subunit                                                        | 3.969 up | 0.00214   | -8.214  |
| Gmet_1395 | type IV pilus biogenesis protein PilC                                                                | 3.962 up | 0.0245    | -4.224  |
| Gmet_2702 | phosphate ABC transporter, membrane protein PstC                                                     | 3.946 up | 0.0121    | -5.18   |
| Gmet_0457 | aminotransferase, AHBA_syn family                                                                    | 3.928 up | 0.00708   | -5.993  |
| Gmet_0821 | methyl-accepting chemotaxis sensory transducer, mcp013                                               | 3.900 up | 0.0125    | -5.114  |
| Gmet_0145 | protein of unknown function DUF167                                                                   | 3.897 up | 0.00417   | -6.886  |
| Gmet_2720 | zinc protease TldD, putative modulator of DNA gyrase                                                 | 3.895 up | 0.00451   | -6.741  |
| Gmet_0166 | lipoprotein, putative                                                                                | 3.888 up | 0.00735   | -5.919  |
| Gmet_2006 | selenocysteine lyase; sufS                                                                           | 3.883 up | 0.00236   | -7.987  |
| Gmet_2002 | conserved hypothetical protein                                                                       | 3.882 up | 0.00498   | -6.574  |
| Gmet_3474 | sensor histidine kinase (HATPase_c)                                                                  | 3.881 up | 0.00604   | -6.253  |
| Gmet_2426 | sensor histidine kinase response regulator (HAMP, HisKA, HATPase_c, REC), putative heme-binding site | 3.853 up | 0.00353   | -7.194  |
| Gmet_0299 | HPP family protein                                                                                   | 3.815 up | 0.0249    | -4.204  |
| Gmet_2013 | polysaccharide deacetylase, putative                                                                 | 3.812 up | 0.000204  | -14.862 |
| Gmet_1552 | ABC transporter, ATP-binding protein                                                                 | 3.812 up | 0.00255   | -7.833  |
| Gmet_2419 | chemotaxis protein-glutamine deamidase and protein-glutamate methyltransferase CheD                  | 3.776 up | 0.00707   | -5.985  |
| Gmet_3210 | chemotaxis protein phosphatase CheC                                                                  | 3.772 up | 0.00724   | -5.944  |
| Gmet_1832 | OmpA family outer membrane protein                                                                   | 3.728 up | 0.0000503 | -22.364 |
| Gmet_1734 | conserved hypothetical protein                                                                       | 3.722 up | 0.0162    | -4.754  |
| Gmet_2044 | hypothetical protein                                                                                 | 3.680 up | 0.0126    | -5.104  |



|           |                                                                   |          |           |         |
|-----------|-------------------------------------------------------------------|----------|-----------|---------|
| Gmet_1998 | porin lipoprotein, putative                                       | 3.671 up | 0.000112  | -17.55  |
| Gmet_0159 | NADH dehydrogenase I, G subunit,nuoG-2                            | 3.656 up | 0.00373   | -7.063  |
| Gmet_0454 | sugar cytidyltransferase and glycosyltransferase domain protein   | 3.644 up | 0.0418    | -3.592  |
| Gmet_2019 | ornithine/diaminopimelate/arginine decarboxylase 2                | 3.630 up | 0.0165    | -4.731  |
| Gmet_0974 | type IV pilus assembly lipoprotein PilP, putative; pilP           | 3.613 up | 0.0173    | -4.664  |
| Gmet_0172 | NADH dehydrogenase I, N subunit lipoprotein; nuoN-2               | 3.607 up | 0.00161   | -8.778  |
| Gmet_3362 | periplasmic trypsin-like serine protease lipoprotein              | 3.607 up | 0.0294    | -3.991  |
| Gmet_0142 | cytochrome c, 8 heme-binding sites                                | 3.603 up | 0.00515   | -6.524  |
| Gmet_2827 | chemotaxis protein CheY-8                                         | 3.600 up | 0.0016    | -8.813  |
| Gmet_0559 | conserved hypothetical protein                                    | 3.599 up | 0.0109    | -5.328  |
| Gmet_2431 | chemotaxis protein CheY-2                                         | 3.569 up | 0.00347   | -7.231  |
| Gmet_0563 | membrane protein                                                  | 3.568 up | 0.00218   | -8.183  |
| Gmet_2022 | hypothetical protein                                              | 3.561 up | 0.0000471 | -22.936 |
| Gmet_3149 | conserved hypothetical protein                                    | 3.549 up | 0.000898  | -10.036 |
| Gmet_3147 | protein of unknown function DUF1458                               | 3.548 up | 0.00801   | -5.773  |
| Gmet_2505 | peptidoglycan L,D-transpeptidase, YkuD family                     | 3.530 up | 0.00287   | -7.617  |
| Gmet_0032 | SpoVR-like family protein                                         | 3.522 up | 0.00605   | -6.245  |
| Gmet_0031 | conserved hypothetical protein                                    | 3.501 up | 0.0179    | -4.616  |
| Gmet_0834 | hemerythrin family protein                                        | 3.462 up | 0.000517  | -11.467 |
| Gmet_1997 | hypothetical protein                                              | 3.455 up | 0.000428  | -11.998 |
| Gmet_2721 | sensor diguanylate cyclase (GAF, GGDEF)                           | 3.452 up | 0.00302   | -7.526  |
| Gmet_1617 | lipoprotein, putative                                             | 3.446 up | 0.0144    | -4.922  |
| Gmet_1924 | cytochrome c, 5 heme-binding sites                                | 3.441 up | 0.0000727 | -20.413 |
| Gmet_2004 | glycosyltransferase                                               | 3.435 up | 0.00144   | -9.035  |
| Gmet_2617 | barnase inhibitor barstar                                         | 3.412 up | 0.0228    | -4.314  |
| Gmet_2639 | response receiver sensor histidine kinase (REC, HisKA, HATPase_c) | 3.394 up | 0.00371   | -7.081  |
| Gmet_3107 | conserved hypothetical protein                                    | 3.386 up | 0.0218    | -4.381  |
| Gmet_2435 | potassium-transporting ATPase, C subunit;kdpC                     | 3.386 up | 0.0143    | -4.934  |
| Gmet_3400 | twitching motility pilus retraction protein; pilT-3               | 3.368 up | 0.0148    | -4.875  |
| Gmet_1970 | membrane protein, putative                                        | 3.358 up | 0.00725   | -5.945  |
| Gmet_0146 | conserved hypothetical protein                                    | 3.352 up | 0.000546  | -11.272 |
| Gmet_0695 | ammonium transporter; amtB                                        | 3.339 up | 0.00935   | -5.57   |
| Gmet_0183 | peroxiredoxin, atypical 2-Cys subfamily                           | 3.301 up | 0.0000857 | -19.061 |
| Gmet_2811 | sensor histidine kinase (Cache, HAMP, PAS, PAC, HisKA, HATPase_c) | 3.299 up | 0.000247  | -14.013 |
| Gmet_0356 | conserved hypothetical protein                                    | 3.294 up | 0.000248  | -14.062 |
| Gmet_1189 | magnesium transport protein CorA-1                                | 3.272 up | 0.0016    | -8.813  |

|           |                                                                                          |          |           |         |
|-----------|------------------------------------------------------------------------------------------|----------|-----------|---------|
| Gmet_1999 | lipoprotein, putative                                                                    | 3.267 up | 0.000548  | -11.286 |
| Gmet_1996 | lipoprotein, putative                                                                    | 3.266 up | 0.00452   | -6.742  |
| Gmet_0911 | conserved hypothetical protein                                                           | 3.249 up | 0.0237    | -4.265  |
| Gmet_0987 | sensor diguanylate cyclase/phosphodiesterase (PAS, GGDEF, EAL)                           | 3.245 up | 0.0000295 | -28.801 |
| Gmet_2768 | glucose-1-phosphate adenylyltransferase                                                  | 3.238 up | 0.0036    | -7.153  |
| Gmet_2894 | conserved hypothetical protein                                                           | 3.229 up | 0.00333   | -7.32   |
| Gmet_0975 | type IV pilus secretin lipoprotein PilQ                                                  | 3.212 up | 0.0213    | -4.407  |
| Gmet_0712 | methyl-accepting chemotaxis sensory transducer, mcp011                                   | 3.206 up | 0.0000459 | -22.931 |
| Gmet_3617 | conserved hypothetical protein                                                           | 3.189 up | 0.000348  | -12.65  |
| Gmet_2410 | superoxide dismutase, iron/manganese-containing, sodA                                    | 3.186 up | 0.0108    | -5.349  |
| Gmet_0968 | hypothetical protein                                                                     | 3.185 up | 0.00057   | -11.12  |
| Gmet_3317 | chemotaxis protein CheW-8 (MvhQ)                                                         | 3.158 up | 0.0354    | -3.773  |
| Gmet_0272 | lipoprotein, putative                                                                    | 3.153 up | 0.0467    | -3.461  |
| Gmet_2642 | sensor histidine kinase response receiver domain protein (GAF, HATPase_c, REC, REC, REC) | 3.134 up | 0.00226   | -8.071  |
| Gmet_2418 | response receiver chemotaxis protein-glutamate methyltransferase CheB-2                  | 3.129 up | 0.00876   | -5.65   |
| Gmet_0913 | cytochrome c, 9 heme-binding sites                                                       | 3.120 up | 0.00341   | -7.261  |
| Gmet_0355 | histone-like protein; hup-1                                                              | 3.115 up | 0.00685   | -6.048  |
| Gmet_0452 | hypothetical protein                                                                     | 3.106 up | 0.0443    | -3.523  |
| Gmet_2007 | coenzyme F390 synthetase superfamily protein                                             | 3.033 up | 0.000722  | -10.518 |
| Gmet_1558 | cysteine synthase A; cysK-2                                                              | 3.032 up | 0.0426    | -3.569  |
| Gmet_2468 | conserved hypothetical protein                                                           | 3.019 up | 0.0128    | -5.082  |
| Gmet_2704 | phosphate ABC transporter ATP-binding protein                                            | 2.992 up | 0.011     | -5.306  |
| Gmet_2008 | glycosyl transferase family protein                                                      | 2.985 up | 0.0276    | -4.068  |
| Gmet_2430 | methyl-accepting chemotaxis sensory transducer                                           | 2.971 up | 0.00134   | -9.203  |
| Gmet_2719 | hypothetical protein                                                                     | 2.955 up | 0.0257    | -4.161  |
| Gmet_0581 | high-molecular-weight cytochrome c                                                       | 2.940 up | 0.000282  | -13.487 |
| Gmet_1005 | multi-sensor signal transduction histidine kinase                                        | 2.918 up | 0.0438    | -3.535  |
| Gmet_1384 | cytochrome c biogenesis protein, transmembrane region                                    | 2.913 up | 0.012     | -5.189  |
| Gmet_0912 | cytochrome c family protein                                                              | 2.908 up | 0.0136    | -5.007  |
| Gmet_1733 | O-methyltransferase family protein                                                       | 2.889 up | 0.0125    | -5.134  |
| Gmet_2061 | Na <sup>+</sup> /solute symporter                                                        | 2.888 up | 0.027     | -4.102  |
| Gmet_1965 | fibronectin, type III                                                                    | 2.887 up | 0.0278    | -4.06   |
| Gmet_0725 | hypothetical protein                                                                     | 2.864 up | 0.00361   | -7.142  |
| Gmet_1922 | Rieske (2Fe-2S) region                                                                   | 2.853 up | 0.00794   | -5.808  |
| Gmet_1553 | hypothetical protein                                                                     | 2.850 up | 0.00938   | -5.558  |
| Gmet_1919 | response regulator receiver                                                              | 2.844 up | 0.00966   | -5.502  |

|           |                                                        |          |          |         |
|-----------|--------------------------------------------------------|----------|----------|---------|
|           | (CheY-like) modulated metal dependent phosphohydrolase |          |          |         |
| Gmet_0425 | hypothetical protein                                   | 2.843 up | 0.000247 | -13.956 |
| Gmet_0035 | metal dependent phosphohydrolase                       | 2.820 up | 0.000201 | -15.082 |
| Gmet_1963 | signal peptide protein                                 | 2.793 up | 0.00439  | -6.785  |
| Gmet_1079 | CheW protein                                           | 2.775 up | 0.0206   | -4.449  |
| Gmet_0034 | metallophosphoesterase                                 | 2.767 up | 0.000166 | -15.699 |
| Gmet_1559 | peptidase M23B                                         | 2.737 up | 0.0138   | -4.992  |
| Gmet_0833 | Alpha amylase, catalytic region                        | 2.733 up | 0.00602  | -6.265  |
| Gmet_1918 | PAS/PAC sensor hybrid histidine kinase                 | 2.710 up | 0.0444   | -3.513  |
| Gmet_3275 | metal dependent phosphohydrolase                       | 2.709 up | 0.0169   | -4.698  |
| Gmet_1188 | peptidoglycan binding domain-containing protein        | 2.694 up | 0.0199   | -4.495  |
| Gmet_2641 | MCP methyltransferase, CheR-type                       | 2.690 up | 0.000299 | -13.183 |
| Gmet_1371 | hypothetical protein                                   | 2.666 up | 0.00468  | -6.68   |
| Gmet_2826 | CheB methylesterase                                    | 2.633 up | 0.0187   | -4.567  |
| Gmet_3478 | PAS/PAC sensor signal transduction histidine kinase    | 2.606 up | 0.000041 | -24.406 |
| Gmet_1155 | integral membrane protein TerC                         | 2.604 up | 0.0104   | -5.417  |
| Gmet_1551 | response regulator receiver domain-containing protein  | 2.589 up | 0.0428   | -3.562  |
| Gmet_2158 | two component LuxR family transcriptional regulator    | 2.570 up | 0.0157   | -4.795  |
| Gmet_1220 | response regulator receiver domain-containing protein  | 2.569 up | 0.00336  | -7.297  |
| Gmet_2938 | methyl-accepting chemotaxis sensory transducer         | 2.560 up | 0.000301 | -13.141 |
| Gmet_1373 | hypothetical protein                                   | 2.555 up | 0.00199  | -8.357  |
| Gmet_2440 | cobalt ABC transporter CbiQ, permease subunit          | 2.548 up | 0.00192  | -8.462  |
| Gmet_0298 | PAS/PAC sensor protein                                 | 2.541 up | 0.0216   | -4.392  |
| Gmet_1190 | Outer membrane efflux protein                          | 2.539 up | 0.0272   | -4.086  |
| Gmet_0458 | polysaccharide biosynthesis protein CapD               | 2.536 up | 0.00312  | -7.469  |
| Gmet_3122 | rhodanese-like protein                                 | 2.519 up | 0.0107   | -5.362  |
| Gmet_2939 | diguanylate cyclase/phosphodiesterase                  | 2.507 up | 0.0166   | -4.723  |
| Gmet_2157 | two component AraC family transcriptional regulator    | 2.504 up | 0.0327   | -3.872  |
| Gmet_1946 | glyceraldehyde-3-phosphate dehydrogenase               | 2.497 up | 0.00512  | -6.533  |
| Gmet_0583 | spermine synthase                                      | 2.495 up | 0.0311   | -3.928  |
| Gmet_1969 | glycosyl transferase, group 1                          | 2.483 up | 0.0263   | -4.137  |
| Gmet_2011 | hypothetical protein                                   | 2.483 up | 0.00547  | -6.412  |
| Gmet_0598 | PKD                                                    | 2.482 up | 0.0467   | -3.46   |
| Gmet_0825 | cytochrome c family protein                            | 2.482 up | 0.00965  | -5.507  |
| Gmet_0835 | hypothetical protein                                   | 2.473 up | 0.049    | -3.404  |
| Gmet_1078 | methyl-accepting chemotaxis sensory transducer         | 2.467 up | 0.0113   | -5.275  |
| Gmet_0736 | hypothetical protein                                   | 2.452 up | 0.0175   | -4.644  |
| Gmet_0930 | cytochrome c family protein                            | 2.450 up | 0.00389  | -6.994  |
| Gmet_3455 | PAS/PAC sensor signal                                  | 2.433 up | 0.00272  | -7.72   |

|           |                                                           |          |          |         |
|-----------|-----------------------------------------------------------|----------|----------|---------|
|           | transduction histidine kinase                             |          |          |         |
| Gmet_3152 | glycine dehydrogenase subunit 2                           | 2.430 up | 0.0295   | -3.985  |
| Gmet_1230 | serine phosphatase                                        | 2.430 up | 0.00241  | -7.956  |
| Gmet_1153 | hypothetical protein                                      | 2.427 up | 0.00709  | -5.985  |
| Gmet_1429 | Outer membrane lipoprotein Slp                            | 2.422 up | 0.0394   | -3.654  |
| Gmet_0533 | hypothetical protein                                      | 2.417 up | 0.0392   | -3.661  |
| Gmet_0342 | thrombospondin type 3 repeat-containing OmpA/MotB protein | 2.404 up | 0.0328   | -3.863  |
| Gmet_0666 | PAS/PAC sensor signal transduction histidine kinase       | 2.355 up | 0.00535  | -6.452  |
| Gmet_0966 | hypothetical protein                                      | 2.348 up | 0.00349  | -7.213  |
| Gmet_0567 | hypothetical protein                                      | 2.333 up | 0.0295   | -3.987  |
| Gmet_1655 | CoA-binding protein                                       | 2.325 up | 0.0104   | -5.413  |
| Gmet_2506 | rhomboid-like protein                                     | 2.320 up | 0.000823 | -10.215 |
| Gmet_3504 | cobalamin B12-binding/radical SAM family protein          | 2.314 up | 0.00695  | -6.026  |
| Gmet_2010 | glycosyl transferase family protein                       | 2.312 up | 0.0374   | -3.708  |
| Gmet_3310 | lipoprotein                                               | 2.307 up | 0.0121   | -5.175  |
| Gmet_2437 | two component transcriptional regulato                    | 2.305 up | 0.014    | -4.957  |
| Gmet_1025 | hypothetical protein                                      | 2.304 up | 0.0319   | -3.901  |
| Gmet_0960 | histidine kinase                                          | 2.295 up | 0.00193  | -8.43   |
| Gmet_2009 | O-antigen polymerase                                      | 2.295 up | 0.0196   | -4.514  |
| Gmet_1218 | PAS/PAC sensor signal transduction histidine kinas        | 2.283 up | 0.000043 | -23.664 |
| Gmet_1909 | pyridoxamine 5'-phosphate oxidase-related, FMN-binding    | 2.270 up | 0.0418   | -3.594  |
| Gmet_0451 | glucuronate isomerase                                     | 2.251 up | 0.0406   | -3.626  |
| Gmet_0162 | ankyrin                                                   | 2.249 up | 0.0196   | -4.51   |
| Gmet_1243 | histidine kinase                                          | 2.241 up | 0.00691  | -6.034  |
| Gmet_2001 | glycosyl transferase, group 1                             | 2.234 up | 0.00562  | -6.372  |
| Gmet_1654 | HhH-GPD                                                   | 2.221 up | 0.0037   | -7.081  |
| Gmet_0028 | groES co-chaperonin GroES                                 | 2.210 up | 0.00329  | -7.348  |
| Gmet_2760 | dehydrogenase, E1 component                               | 2.191 up | 0.000984 | -9.831  |
| Gmet_2078 | hypothetical protein                                      | 2.184 up | 0.0427   | -3.565  |
| Gmet_2436 | smosensitive K <sup>+</sup> channel                       | 2.182 up | 0.0208   | -4.435  |
| Gmet_2156 | hypothetical protein                                      | 2.178 up | 0.00207  | -8.274  |
| Gmet_2897 | NHL repeat-containing protein                             | 2.173 up | 0.0125   | -5.118  |
| Gmet_0972 | fimbrial assembly                                         | 2.170 up | 0.0266   | -4.115  |
| Gmet_3483 | pseudo                                                    | 2.167 up | 0.0275   | -4.074  |
| Gmet_0815 | PpiC-type peptidyl-prolyl cis-trans isomerase             | 2.166 up | 0.0477   | -3.432  |
| Gmet_1023 | pseudo                                                    | 2.158 up | 0.00329  | -7.341  |
| Gmet_1544 | hypothetical protein                                      | 2.155 up | 0.00796  | -5.798  |
| Gmet_1447 | chromosome partitioning ATPase                            | 2.155 up | 0.000478 | -11.701 |
| Gmet_0173 | hypothetical protein                                      | 2.153 up | 0.0128   | -5.082  |
| Gmet_2305 | MCP methyltransferase, CheR-typ                           | 2.148 up | 0.0257   | -4.165  |
| Gmet_2824 | multi-sensor hybrid histidine kinase                      | 2.132 up | 0.00673  | -6.071  |
| Gmet_0151 | pseudo                                                    | 2.122 up | 0.00604  | -6.256  |
| Gmet_0969 | hypothetical protein                                      | 2.118 up | 0.000615 | -10.917 |
| Gmet_0424 | hypothetical protein                                      | 2.106 up | 0.00156  | -8.897  |
| Gmet_1404 | hypothetical protein                                      | 2.097 up | 0.0239   | -4.255  |
| Gmet_2582 | excinuclease ATPase subunit-like                          | 2.093 up | 0.0059   | -6.293  |

|           |                                                     |          |          |        |
|-----------|-----------------------------------------------------|----------|----------|--------|
| Gmet_2663 | hypothetical protein                                | 2.090 up | 0.0457   | -3.485 |
| Gmet_1543 | YHS                                                 | 2.077 up | 0.0228   | -4.31  |
| Gmet_0138 | hypothetical protein                                | 2.073 up | 0.0433   | -3.549 |
| Gmet_1614 | cation transporter E1-E2 family<br>ATPase           | 2.073 up | 0.000134 | -16.69 |
| Gmet_2390 | O-acetylhomoserine/O-<br>acetylserine sulfhydrylase | 2.068 up | 0.0139   | -4.978 |
| Gmet_1545 | hypothetical protein                                | 2.064 up | 0.00653  | -6.128 |
| Gmet_3213 | thiamine-monophosphate kinase                       | 2.057 up | 0.002    | -8.357 |
| Gmet_3170 | 4Fe-4S ferredoxin, iron-sulfur<br>binding protein   | 2.057 up | 0.0437   | -3.536 |
| Gmet_2651 | metallophosphoesterase                              | 2.040 up | 0.0201   | -4.475 |
| Gmet_1608 | histone-like DNA-binding protein                    | 2.017 up | 0.00904  | -5.612 |
| Gmet_3031 | Na <sup>+</sup> /solute symporter                   | 2.012 up | 0.0281   | -4.048 |
| Gmet_0959 | type 4 prepilin peptidas                            | 2.011 up | 0.0273   | -4.081 |

Table S2. Bacterial strains and plasmids used in this study

| Strain or plasmid                | Relevant characteristic(s)                                                            | Source or reference      |
|----------------------------------|---------------------------------------------------------------------------------------|--------------------------|
| Strains                          |                                                                                       |                          |
| <i>E. coli</i>                   |                                                                                       |                          |
| TOP10                            | <i>recA1 endA1 gyrA96 thi-1 hsdR17</i> ( $r_K^- m_K^+$ ) <i>supE44 relA1 ΔlacU169</i> | Invitrogen, Carlsbad, CA |
| <i>G. metallireducens</i>        |                                                                                       |                          |
| GS-15 (ATCC 53774)               | Wild type                                                                             | (1)                      |
| 2896                             | <i>ΔGmet 2896::Sp<sup>r</sup></i>                                                     | This work                |
| 0558                             | <i>ΔGmet 0558::Sp<sup>r</sup></i>                                                     | This work                |
| 0557                             | <i>ΔGmet 0557::Sp<sup>r</sup></i>                                                     | This work                |
| 1868                             | <i>ΔGmet 1868::Sp<sup>r</sup></i>                                                     | This work                |
| 1867                             | <i>ΔGmet 1867::Sp<sup>r</sup></i>                                                     | This work                |
| 0930                             | <i>ΔGmet 0930::Sp<sup>r</sup></i>                                                     | This work                |
| 0679                             | <i>ΔGmet 0679::Sp<sup>r</sup></i>                                                     | This work                |
| 0825                             | <i>ΔGmet 0825::Sp<sup>r</sup></i>                                                     | This work                |
| 2839                             | <i>ΔGmet 2839::Sp<sup>r</sup></i>                                                     | This work                |
| 0912                             | <i>ΔGmet 0912::Sp<sup>r</sup></i>                                                     | This work                |
| 0913                             | <i>ΔGmet 0913::Sp<sup>r</sup></i>                                                     | This work                |
| 0910                             | <i>ΔGmet 0910::Sp<sup>r</sup></i>                                                     | This work                |
| 0571                             | <i>ΔGmet 0571::Sp<sup>r</sup></i>                                                     | This work                |
| 0580                             | <i>ΔGmet 0580::Sp<sup>r</sup></i>                                                     | This work                |
| 2470                             | <i>ΔGmet 2470::Sp<sup>r</sup></i>                                                     | This work                |
| 0534                             | <i>ΔGmet 0534::Sp<sup>r</sup></i>                                                     | This work                |
| 0581                             | <i>ΔGmet 0581::Sp<sup>r</sup></i>                                                     | This work                |
| 1866                             | <i>ΔGmet 1866::Sp<sup>r</sup></i>                                                     | This work                |
| 0907                             | <i>ΔGmet 0907::Sp<sup>r</sup></i>                                                     | This work                |
| 0911                             | <i>ΔGmet 0911::Sp<sup>r</sup></i>                                                     | This work                |
| 0908                             | <i>ΔGmet 0908::Sp<sup>r</sup></i>                                                     | This work                |
| 0556                             | <i>ΔGmet 0556::Sp<sup>r</sup></i>                                                     | This work                |
| Plasmids                         |                                                                                       |                          |
| pCR2.1-TOPO                      | PCR cloning vector; Ap <sup>r</sup> , Km <sup>r</sup>                                 | Invitrogen, Carlsbad, CA |
| pUC19- <i>Sp<sup>r</sup>loxP</i> | pUC19 carrying <i>Sp<sup>r</sup>loxP</i> ; Ap <sup>r</sup> , Sp <sup>r</sup>          | (3)                      |
| pCM66                            | Broad-host-range expression vector; Km <sup>r</sup>                                   | (2)                      |
| pJS1                             | pCM66 carrying Gmet 2896                                                              | This work                |
| pJS2                             | pCM66 carrying Gmet 0558                                                              | This work                |
| pJS3                             | pCM66 carrying Gmet 0557                                                              | This work                |
| pJS4                             | pCM66 carrying Gmet 1867                                                              | This work                |
| pJS5                             | pCM66 carrying Gmet 1868                                                              | This work                |
| pJS6                             | pCM66 carrying Gmet 0930                                                              | This work                |
| pJS7                             | pCM66 carrying Gmet 0556                                                              | This work                |

TABLE S3. Primers used for mutant construction, complementation, and qRT-PCR

| Primer name      | Purpose                        | Sequence (5' to 3')                                 | Source or reference |
|------------------|--------------------------------|-----------------------------------------------------|---------------------|
| JsSpF            | <i>Sp<sup>r</sup></i> cassette |                                                     | This work           |
| JsSpR            | <i>Sp<sup>r</sup></i> cassette |                                                     | This work           |
| Gm2896comF       | 2896 into pJS1                 | CAGGGATCCAACGAGGAGGAAGGAA<br>CAATG <sup>b</sup>     | This work           |
| Gm2896comR       | 2896 into pJS1                 | TGCGGTACCCCATCGGCTCGTCACAA<br>CCTAC <sup>c</sup>    | This work           |
| Gmet2896up       | $\Delta 2896::Sp^r$            | CGGCCCTCCACCACGTTACTCTGG                            | This work           |
| Gmet2896AvrIIup  | $\Delta 2896::Sp^r$            | CAGCCTAGGCATTGTTCCCTCCTCCTC<br>GTTA <sup>a</sup>    | This work           |
| Gmet2896AvrII dn | $\Delta 2896::Sp^r$            | GTACCTAGGTCCACCATGGCGGGGAG<br>CGC <sup>a</sup>      | This work           |
| Gmet2896dn       | $\Delta 2896::Sp^r$            | GGATCTTGCCGGCGCTCGTCG                               | This work           |
| Gm0558comF       | 0558 into pJS2                 | TATTCTAGATTGCTCAGGAGCTCGCCA<br>TGT <sup>d</sup>     | This work           |
| Gm0558comR       | 0558 into pJS2                 | GCAGGATCCCCCTCCCCTCTTGATCGC<br>T <sup>b</sup>       | This work           |
| Gmet0558up       | $\Delta 0558::Sp^r$            | GCCGGAATTGATGCTGGCGGTG                              | This work           |
| Gmet0558AvrIIup  | $\Delta 0558::Sp^r$            | CAGCCTAGGCATGGCGAGCTCCTGAG<br>CAAG <sup>a</sup>     | This work           |
| Gmet0558AvrII dn | $\Delta 0558::Sp^r$            | GTACCTAGGCTGCCACTTCCAGCCGA<br>CACCAC <sup>a</sup>   | This work           |
| Gmet0558dn       | $\Delta 0558::Sp^r$            | TCAGGGTGCCTCGCACGGTTA                               | This work           |
| Gm0557comF       | 0557 into pJS3                 | TATGCATGCACACGCAACGAGGTTTT<br>CAAGATG <sup>c</sup>  | This work           |
| Gm0557comR       | 0557 into pJS3                 | GCATCTAGAGCAAGGCAGACACGTCC<br>TA <sup>d</sup>       | This work           |
| Gmet0557up       | $\Delta 0557::Sp^r$            | CGGCCCTTACGCTTGACCCGG                               | This work           |
| Gmet0557AvrIIup  | $\Delta 0557::Sp^r$            | CAGCCTAGGCATCTTGAAAACCTCGT<br>TGCGTG <sup>a</sup>   | This work           |
| Gmet0557AvrII dn | $\Delta 0557::Sp^r$            | GTACCTAGGTAATACCGGCAGCGCCA<br>TGTG <sup>a</sup>     | This work           |
| Gmet0557dn       | $\Delta 0557::Sp^r$            | CCAGGGTATGGTCAGTGGTGCTG                             | This work           |
| Gm1867comF       | 1867 into pJS4                 | GCGGCATGCAATAATCCATGAGTAAG<br>CAACAATG <sup>c</sup> | This work           |
| Gm1867comR       | 1867 into pJS4                 | TATTCTAGAGGCACCTCTGTGGGTCTA<br>d                    | This work           |
| Gmet1867up       | $\Delta 1867::Sp^r$            | ACGATACCACCCAGACCTTCG                               | This work           |
| Gmet1867AvrIIup  | $\Delta 1867::Sp^r$            | CAGCCTAGGCATTGTTGCTTACTCATG<br>GAT <sup>a</sup>     | This work           |
| Gmet1867AvrII dn | $\Delta 1867::Sp^r$            | GTACCTAGGCTTTCCTGTCATGGTGTC<br>G <sup>a</sup>       | This work           |
| Gmet1867dn       | $\Delta 1867::Sp^r$            | ACATTCCGTGGCATCAACTATTGCA                           | This work           |
| Gm1868comF       | 1868 into pJS5                 | TATGCATGCCCTGAGGCAAGGCACGC<br>CATG <sup>c</sup>     | This work           |
| Gm1868comR       | 1868 into pJS5                 | GCGTCTAGAATCGCCATTGTTGCTTAC<br>TCATG <sup>d</sup>   | This work           |
| Gmet1868up       | $\Delta 1868::Sp^r$            | GGTGATGTTTATGTGGTTGATGTG                            | This work           |
| Gmet1868AvrIIup  | $\Delta 1868::Sp^r$            | CAGCCTAGGAAAAGGTTGTCTGTTTT<br>AACC <sup>a</sup>     | This work           |
| Gmet1868AvrII dn | $\Delta 1868::Sp^r$            | GTACCTAGGACTCGGTGTGCACTAA<br>CTGTCA <sup>a</sup>    | This work           |
| Gmet1868dn       | $\Delta 1868::Sp^r$            | GTTTCATATTCCTTGTTTACGGACG                           | This work           |
| Gmet0930comF     | 0930 into pJS6                 | TATTCTAGACGAAAGGAGCAGAAAGG                          | This work           |

|                  |                     |                                                                          |           |
|------------------|---------------------|--------------------------------------------------------------------------|-----------|
| Gmet0930comR     | 0930 into pJS6      | GATG <sup>d</sup><br>GCAGGATCCCCTATCCC GGAACATCA<br>AAAATTA <sup>b</sup> | This work |
| Gmet0930up       | $\Delta 0930::Sp^r$ | GGTGGCTTAACGAGTGTGCGTGG                                                  | This work |
| Gmet0930AvrIIup  | $\Delta 0930::Sp^r$ | CAGCCTAGGCATCCCTTTCTGCTCCTT<br>TC <sup>a</sup>                           | This work |
| Gmet0930AvrIIIdn | $\Delta 0930::Sp^r$ | GTACCTAGGTCGTTACCGGCGCAGGC<br>A <sup>a</sup>                             | This work |
| Gmet0930dn       | $\Delta 0930::Sp^r$ | GGGAGGCGGCAACATTGGAGCCG                                                  | This work |
| Gm0556comF       | 0556 into pJS7      | TATGCATGCGAATGCGGAGGCATTAC<br>CATG <sup>e</sup>                          | This work |
| Gm0556comR       | 0556 into pJS7      | GCATCTAGATCCACCCCGAGGGGTTTC<br>TA <sup>d</sup>                           | This work |
| Gmet0556up       | $\Delta 0556::Sp^r$ | CGTGGGGCTCACCACCTTCAAGC                                                  | This work |
| Gmet0556AvrIIup  | $\Delta 0556::Sp^r$ | CAGCCTAGGCATGGTAATGCCTCCGC<br>ATTC <sup>a</sup>                          | This work |
| Gmet0556AvrIIIdn | $\Delta 0556::Sp^r$ | GTACCTAGGGGACGCAATACTGATCA<br>TGAG <sup>a</sup>                          | This work |
| Gmet0556dn       | $\Delta 0556::Sp^r$ | GTATATGATGATCCCACGGCC                                                    | This work |
| Gmet0679up       | $\Delta 0679::Sp^r$ | ACGATGACCTCCTGCAGCGCTGCG                                                 | This work |
| Gmet0679AvrIIup  | $\Delta 0679::Sp^r$ | CAGCCTAGGCATGATTGGTTCTCCTT<br>GACCAA <sup>a</sup>                        | This work |
| Gmet0679AvrIIIdn | $\Delta 0679::Sp^r$ | GTACCTAGGGTTGATATGGCGGTGAA<br>GCAGGTGA <sup>a</sup>                      | This work |
| Gmet0679dn       | $\Delta 0679::Sp^r$ | TGCGGCGTTGACGACAGGGTGGCGG                                                | This work |
| Gmet0825up       | $\Delta 0825::Sp^r$ | GCGGATAACCTCCCGAACCGACAGCA                                               | This work |
| Gmet0825AvrIIup  | $\Delta 0825::Sp^r$ | CAGCCTAGGCATCGGATACAGTCCCT<br>TTCCG <sup>a</sup>                         | This work |
| Gmet0825AvrIIIdn | $\Delta 0825::Sp^r$ | GTACCTAGGCCTCACCTGCCACCAGG<br>ATGCGC <sup>a</sup>                        | This work |
| Gmet0825dn       | $\Delta 0825::Sp^r$ | GCACCAGGTCCGTTGACGTAGA                                                   | This work |
| Gmet2839up       | $\Delta 2839::Sp^r$ | CTGCCTCCACGCCTTTCTTGTT                                                   | This work |
| Gmet2839AvrIIup  | $\Delta 2839::Sp^r$ | CAGCCTAGGCATCGTTCCTCCTCTGTG<br>a                                         | This work |
| Gmet2839AvrIIIdn | $\Delta 2839::Sp^r$ | GTACCTAGGGCCAAAGCCGCTCCTGC<br>GAAG <sup>a</sup>                          | This work |
| Gmet2839dn       | $\Delta 2839::Sp^r$ | ACCGCCTGAAGGAAGACAAGAAG                                                  | This work |
| Gmet0912up       | $\Delta 0912::Sp^r$ | GCGAGTGGTATCAGAGCTATCCGA                                                 | This work |
| Gmet0912AvrIIup  | $\Delta 0912::Sp^r$ | CAGCCTAGGCACGGATTCTCCCCCTTT<br>CTAGAAG <sup>a</sup>                      | This work |
| Gmet0912AvrIIIdn | $\Delta 0912::Sp^r$ | GTACCTAGGTGGCAACATCATCGATC<br>GTA <sup>a</sup>                           | This work |
| Gmet0912dn       | $\Delta 0912::Sp^r$ | CATGGCCTGACTCAGCCCAGTC                                                   | This work |
| Gmet0913up       | $\Delta 0913::Sp^r$ | GGAGAGGGGGTTGCCCCGAAC                                                    | This work |
| Gmet0913AvrIIup  | $\Delta 0913::Sp^r$ | CAGCCTAGGCATGTGGCATACTCCTT<br>GTTG <sup>a</sup>                          | This work |
| Gmet0913AvrIIIdn | $\Delta 0913::Sp^r$ | GTACCTAGGTTAGGGCCGACGCAACA<br>ACAG <sup>a</sup>                          | This work |
| Gmet0913dn       | $\Delta 0913::Sp^r$ | TGCCGTAGTCATCCCTTTGCTC                                                   | This work |
| Gmet0910up       | $\Delta 0910::Sp^r$ | CGTCCAACCAGACCTTCCGGCGCG                                                 | This work |
| Gmet0910AvrIIup  | $\Delta 0910::Sp^r$ | CAGCCTAGGCATAACGCTACTCTCCTTT<br>C <sup>a</sup>                           | This work |
| Gmet0910AvrIIIdn | $\Delta 0910::Sp^r$ | GTACCTAGGACTGCTTGTGGGGCCGG<br>ACT <sup>a</sup>                           | This work |
| Gmet0910dn       | $\Delta 0910::Sp^r$ | CGGTGTTCCGCCCTTGAATCGA                                                   | This work |



|                  |                     |                                                  |           |
|------------------|---------------------|--------------------------------------------------|-----------|
| Gmet0571up       | $\Delta 0571::Sp^r$ | CCATCTGGAGCACCTCTGGAG                            | This work |
| Gmet0571AvrIIup  | $\Delta 0571::Sp^r$ | CAGCCTAGGCATATCATGCCTCCAGC<br>AC <sup>a</sup>    | This work |
| Gmet0571AvrIIIdn | $\Delta 0571::Sp^r$ | GAACCTAGGGGTATGCGGCAACCAGC<br>AT <sup>a</sup>    | This work |
| Gmet0571dn       | $\Delta 0571::Sp^r$ | CAAGATTGAGAAGCCCACGATGC                          | This work |
| Gmet0580up       | $\Delta 0580::Sp^r$ | CCTGGCTCACCATTGCGGCACTTC                         | This work |
| Gmet0580AvrIIup  | $\Delta 0580::Sp^r$ | CAGCCTAGGCATGACTTCCCCACGT<br>CAA <sup>a</sup>    | This work |
| Gmet0580AvrIIIdn | $\Delta 0580::Sp^r$ | GTACCTAGGCGCGACAACGTGTGTCA<br>ATTG <sup>a</sup>  | This work |
| Gmet0580dn       | $\Delta 0580::Sp^r$ | AATCTCGGTTATTGGCGGCACCG                          | This work |
| Gmet2470up       | $\Delta 2470::Sp^r$ | GCTGGAGAACCCCGGCAAGATCC                          | This work |
| Gmet2470AvrIIup  | $\Delta 2470::Sp^r$ | CAGCCTAGGCACGCCACCCCTCCCC<br>ATT <sup>a</sup>    | This work |
| Gmet2470AvrIIIdn | $\Delta 2470::Sp^r$ | GTACCTAGGACCCGACTGGCGTGTGG<br>CCC <sup>a</sup>   | This work |
| Gmet2470dn       | $\Delta 2470::Sp^r$ | GTGGCCGATGTCGTTGCCGCCGG                          | This work |
| Gmet0534up       | $\Delta 0534::Sp^r$ | GGTGGCGAGCGGCATCCAGGGA                           | This work |
| Gmet0534AvrIIup  | $\Delta 0534::Sp^r$ | CAGCCTAGGCATTACCTCTCCTTTAC<br>C <sup>a</sup>     | This work |
| Gmet0534AvrIIIdn | $\Delta 0534::Sp^r$ | GTACCTAGGGGTGGAGATGGTGAACC<br>GTGC <sup>a</sup>  | This work |
| Gmet0534dn       | $\Delta 0534::Sp^r$ | GAAAGCAGCAGGGCGAGCGGAAGCA<br>GC                  | This work |
| Gmet0581up       | $\Delta 0581::Sp^r$ | GCACCGGCAATGACAGCAGCCA                           | This work |
| Gmet0581AvrIIup  | $\Delta 0581::Sp^r$ | CAGCCTAGGCATACCTTACCGTTAC<br>ATGGC <sup>a</sup>  | This work |
| Gmet0581AvrIIIdn | $\Delta 0581::Sp^r$ | GTACCTAGGCACCAACTACACGACGC<br>AGCAC <sup>a</sup> | This work |
| Gmet0581dn       | $\Delta 0581::Sp^r$ | CGATGGTCACTTTTTCGTGCCGCC                         | This work |
| Gmet1866up       | $\Delta 1866::Sp^r$ | GGGAGGCAAGTAAACAAACGGATG                         | This work |
| Gmet1866AvrIIup  | $\Delta 1866::Sp^r$ | CAGCCTAGGCATCGCCTGGCACCTCT<br>GT <sup>a</sup>    | This work |
| Gmet1866AvrIIIdn | $\Delta 1866::Sp^r$ | GTACCTAGGTTCCCCTGTCGAAAATCT<br>GT <sup>a</sup>   | This work |
| Gmet1866dn       | $\Delta 1866::Sp^r$ | CGATGGATAGACGAGGGCTGAG                           | This work |
| Gmet0907up       | $\Delta 0907::Sp^r$ | GCCGGCGAACTGGGTGTCACC                            | This work |
| Gmet0907AvrIIup  | $\Delta 0907::Sp^r$ | CAGCCTAGGCATTGAAAATCCCTTCC<br>GTTT <sup>a</sup>  | This work |
| Gmet0907AvrIIIdn | $\Delta 0907::Sp^r$ | GTACCTAGGTACGCGGATGAGCCTTC<br>TACGG <sup>a</sup> | This work |
| Gmet0907dn       | $\Delta 0907::Sp^r$ | CCGTAACCGTAGAGGGAGAACT                           | This work |
| Gmet0911up       | $\Delta 0911::Sp^r$ | AGCCTCATATCTCCCCTCGCA                            | This work |
| Gmet0911AvrIIup  | $\Delta 0911::Sp^r$ | CAGCCTAGGCATTAGTGGACCTCCTT<br>TCTC <sup>a</sup>  | This work |
| Gmet0911AvrIIIdn | $\Delta 0911::Sp^r$ | GTACCTAGGCGACACGCAAGGACGCT<br>TCG <sup>a</sup>   | This work |
| Gmet0911dn       | $\Delta 0911::Sp^r$ | CGGTGGCATGCTCGCTGTTCCAGA                         | This work |
| Gmet0908up       | $\Delta 0908::Sp^r$ | GGAAAAGGTTGTCCACCGGG                             | This work |
| Gmet0908AvrIIup  | $\Delta 0908::Sp^r$ | CAGCCTAGGCATTAGTGGACCTCCTT<br>TCTCA <sup>a</sup> | This work |
| Gmet0908AvrIIIdn | $\Delta 0908::Sp^r$ | GTACCTAGGATCAACGGCCGCTTCGT<br>TCTG <sup>a</sup>  | This work |

|            |                              |                         |           |
|------------|------------------------------|-------------------------|-----------|
| Gmet0908dn | <u>Δ0908::Sp<sup>r</sup></u> | GCTCTGGCACTGGGTCGCCGAGA | This work |
| 0557QF     | qRT-PCR                      | CCATTAATCCGATTGCCACT    | This work |
| 0557QR     | qRT-PCR                      | AAATCCATGCCGTAATCCAC    | This work |
| 2896QF     | qRT-PCR                      | GCATCCGGTCAACTTCGTAT    | This work |
| 2896QR     | qRT-PCR                      | ACTCCAGGTTATTGGCAACG    | This work |
| 0909QF     | qRT-PCR                      | ATTGCAACGACTGTCACGAT    | This work |
| 0909QR     | qRT-PCR                      | GGGATTATCCATTGCCTTGA    | This work |
| 0930QF     | qRT-PCR                      | GTCGCTCCACAACATTGAGA    | This work |
| 0930QR     | qRT-PCR                      | GACGGATCGGTTGCATACTT    | This work |
| 1868QF     | qRT-PCR                      | ATCCAACACTCTTGCCATCC    | This work |
| 1868QR     | qRT-PCR                      | ACCATTGGGCTCAGACTTGT    | This work |
| 2029QF     | qRT-PCR                      | GAGTATCATCGCATCGCTCA    | This work |
| 2029QR     | qRT-PCR                      | CCGTGCTGAATTCCTCTTTC    | This work |

<sup>a</sup> *AvrII* restriction site is underlined

<sup>b</sup> *BamHI* restriction site is underlined

<sup>c</sup> *Kpn I* restriction site is underlined

<sup>d</sup> *XbaI* restriction site underlined

<sup>e</sup> *Sph I* restriction site is underlined

## References

1. **Lovley DR, Giovannoni SJ, White DC, Champine JE, Phillips EJ, Gorby YA, Goodwin S.** 1993. *Geobacter metallireducens* gen. nov. sp. nov., a microorganism capable of coupling the complete oxidation of organic compounds to the reduction of iron and other metals. Arch. Microbiol. **159**:336-344.
2. **Marx CJ, Lidstrom ME.** 2001. Development of improved versatile broad-host-range vectors for use in methylootrophs and other Gram-negative bacteria. Microbiology **147**:2065-2075.
3. **Tremblay P-L, Aklujkar M, Leang C, Nevin KP, Lovley D.** 2012. A genetic system for *Geobacter metallireducens*: role of the flagellin and pilin in the reduction of Fe(III) oxide. Environ. Microbiol. Rep. **4**:82-88.
